# Supplementary material
Source: PubMed Central journal article supplement (PMC11310923)
Supplement: NIHMS2007850-supplement-Supplementary_Table.pdf [file NIHMS2007850-supplement-Supplementary_Table.pdf]

| Gene                    | OMIM phenotype                                                                                   | OMIM Number |
|-------------------------|--------------------------------------------------------------------------------------------------|-------------|
| ACD                     | ?Dyskeratosis congenita, autosomal dominant 6                                                    | 616553      |
|                         | ?Dyskeratosis congenita, autosomal recessive 7                                                   | 616553      |
| ADA2                    | Sneddon syndrome                                                                                 | 182410      |
|                         | Vasculitis, autoinflammation, immunodeficiency, and hematologic defects syndrome                 | 615688      |
| AK2                     | Reticular dysgenesis                                                                             | 267500      |
| ALAS2                   | Anemia, sideroblastic, 1                                                                         | 300751      |
|                         | Protoporphyrin, erythropoietic, X-linked                                                         | 300752      |
| ANKRD26                 | Thrombocytopenia 2                                                                               | 188000      |
| APC                     | Adenoma, periampullary, somatic                                                                  | 175100      |
|                         | Adenomatous polyposis coli                                                                       | 175100      |
|                         | Brain tumor-polyposis syndrome 2                                                                 | 175100      |
|                         | Colorectal cancer, somatic                                                                       | 114500      |
|                         | Desmoid disease, hereditary                                                                      | 135290      |
|                         | Gardner syndrome                                                                                 | 175100      |
|                         | Gastric adenocarcinoma and proximal polyposis of the stomach                                     | 619182      |
|                         | Gastric cancer, somatic                                                                          | 613659      |
| Hepatoblastoma, somatic | 11455                                                                                            |             |
| ATG2B                   | NA                                                                                               | NA          |
| ATM                     | Ataxia-telangiectasia                                                                            | 208900      |
|                         | Lymphoma, B-cell non-Hodgkin, somatic                                                            | NA          |
| ATR                     | Lymphoma, mantle cell, somatic                                                                   | NA          |
|                         | T-cell prolymphocytic leukemia, somatic                                                          | NA          |
|                         | {Breast cancer, susceptibility to}                                                               | 114480      |
|                         | ?Cutaneous telangiectasia and cancer syndrome, familial                                          | 614564      |
| Seckel syndrome 1       | 210600                                                                                           |             |
| BLM                     | Bloom syndrome                                                                                   | 210900      |
| BRAF                    | Adenocarcinoma of lung, somatic                                                                  | 211980      |
|                         | Cardiofaciocutaneous syndrome                                                                    | 115150      |
|                         | Colorectal cancer, somatic                                                                       | 114500      |
|                         | LEOPARD syndrome 3                                                                               | 613707      |
|                         | Melanoma, malignant, somatic                                                                     | 155600      |
|                         | Non-small cell lung cancer, somatic                                                              | 211980      |
|                         | Noonan syndrome 7                                                                                | 613706      |
| BRCA1                   | Fanconi anemia, complementation group S                                                          | 617883      |
|                         | {Breast-ovarian cancer, familial, 1}                                                             | 604370      |
| BRCA2                   | {Pancreatic cancer, susceptibility to, 4}                                                        | 614320      |
|                         | Fanconi anemia, complementation group D1                                                         | 605724      |
|                         | Wilms tumor                                                                                      | 194070      |
|                         | {Breast cancer, male, susceptibility to}                                                         | 114480      |
|                         | {Breast-ovarian cancer, familial, 2}                                                             | 612555      |
|                         | {Glioblastoma 3}                                                                                 | 613029      |
|                         | {Medulloblastoma}                                                                                | 155255      |
| {Pancreatic cancer 2}   | 613347                                                                                           |             |
| {Prostate cancer}       | 176807                                                                                           |             |
| RIP1 (FANCI)            | Fanconi anemia, complementation group J                                                          | 609054      |
|                         | {Breast cancer, early-onset, susceptibility to}                                                  | 114480      |
| CBL                     | ?Juvenile myelomonocytic leukemia                                                                | 607785      |
| CDKN2A                  | Noonan syndrome-like disorder with or without juvenile myelomonocytic leukemia                   | 613563      |
|                         | {Melanoma and neural system tumor syndrome}                                                      | 155755      |
|                         | {Melanoma, cutaneous malignant, 2}                                                               | 155601      |
| CEBPA                   | {Melanoma-pancreatic cancer syndrome}                                                            | 606719      |
|                         | ?Leukemia, acute myeloid                                                                         | 601626      |
| CHEK2                   | Leukemia, acute myeloid, somatic                                                                 | 601626      |
|                         | Li-Fraumeni syndrome 2                                                                           | 609265      |
|                         | Osteosarcoma, somatic                                                                            | 259500      |
|                         | {Breast cancer, susceptibility to}                                                               | 114480      |
| CSF3R                   | {Colorectal cancer, susceptibility to}                                                           | 114500      |
|                         | {Prostate cancer, familial, susceptibility to}                                                   | 176807      |
|                         | ?Neutrophilia, hereditary                                                                        | 162830      |
| CTCF                    | Neutropenia, severe congenital, 7, autosomal recessive                                           | 617014      |
| CTC1                    | Cerebroretinal microangiopathy with calcifications and cysts                                     | 612199      |
| DDX11                   | Warsaw breakage syndrome                                                                         | 613398      |
| DDX41                   | {Myeloproliferative/lymphoproliferative neoplasms, familial (multiple types), susceptibility to} | 616871      |
| DKC1                    | Dyskeratosis congenita, X-linked                                                                 | 305000      |
| DNAJC21                 | Bone marrow failure syndrome 3                                                                   | 617052      |
| FL1/EFTUD1              | Shwachman-Diamond syndrome 2                                                                     | 617941      |
| ELANE                   | Neutropenia, cyclic                                                                              | 162800      |
|                         | Neutropenia, severe congenital 1, autosomal dominant                                             | 202700      |
| EPCAM                   | Colorectal cancer, hereditary nonpolyposis, type 8                                               | 613244      |
|                         | Diarrhea 5, with tufting enteropathy, congenital                                                 | 613217      |
| ERCC4                   | Fanconi anemia, complementation group Q                                                          | 615272      |
|                         | Xeroderma pigmentosum, group F                                                                   | 278760      |
|                         | Xeroderma pigmentosum, type F/Cockayne syndrome                                                  | 278760      |
|                         | XFE progeroid syndrome                                                                           | 610965      |
| ERCC6L2                 | Bone marrow failure syndrome 2                                                                   | 615715      |
| ESCO2                   | Juberg-Hayward syndrome                                                                          | 216100      |
| ETV6                    | Roberts-SC phocomelia syndrome                                                                   | 268300      |
|                         | Leukemia, acute myeloid, somatic                                                                 | 601626      |
| FANCA                   | Thrombocytopenia 5                                                                               | 616216      |
| FANCB                   | Fanconi anemia, complementation group A                                                          | 227650      |
| FANCC                   | Fanconi anemia, complementation group B                                                          | 300514      |
| FANCD2                  | Fanconi anemia, complementation group C                                                          | 227645      |
| FANCE                   | Fanconi anemia, complementation group D2                                                         | 227646      |
| FANCF                   | Fanconi anemia, complementation group E                                                          | 600901      |
| FANCG                   | Fanconi anemia, complementation group F                                                          | 603467      |
| FANCI                   | Fanconi anemia, complementation group G                                                          | 614082      |
| FANCL                   | Fanconi anemia, complementation group I                                                          | 609053      |
| FANCM                   | Fanconi anemia, complementation group L                                                          | 614083      |
| G6PC3                   | ?Premature ovarian failure 15                                                                    | 618096      |
|                         | Spermatogenic failure 28                                                                         | 618086      |
| GATA1                   | Dursun syndrome                                                                                  | 612541      |
|                         | Neutropenia, severe congenital 4, autosomal recessive                                            | 612541      |
|                         | Anemia, X-linked, with/without neutropenia and/or platelet abnormalities                         | 300835      |
|                         | Leukemia, megakaryoblastic, with or without Down syndrome, somatic                               | 190685      |
| GATA2                   | Thrombocytopenia with beta-thalassemia, X-linked                                                 | 314050      |
|                         | Thrombocytopenia, X-linked, with or without dyserythropoietic anemia                             | 300367      |
|                         | Emberger syndrome                                                                                | 614038      |
|                         | Immunodeficiency 21                                                                              | 614172      |

|        |                                                                                                               |        |
|--------|---------------------------------------------------------------------------------------------------------------|--------|
|        | {Leukemia, acute myeloid, susceptibility to}                                                                  | 601626 |
|        | {Myelodysplastic syndrome, susceptibility to}                                                                 | 614286 |
| GF1    | ?Neutropenia, nonimmune chronic idiopathic, of adults                                                         | 607847 |
|        | Neutropenia, severe congenital 2, autosomal dominant                                                          | 613107 |
| GSKIP  | NA                                                                                                            | NA     |
| HAVCR2 | T-cell lymphoma, subcutaneous panniculitis-like                                                               | 618398 |
| HAX1   | Neutropenia, severe congenital 3, autosomal recessive                                                         | 610738 |
|        | Bladder cancer, somatic                                                                                       | 109800 |
|        | Congenital myopathy with excess of muscle spindles                                                            | 218040 |
|        | Costello syndrome                                                                                             | 218040 |
|        | Nevus sebaceous or woolly hair nevus, somatic                                                                 | 162900 |
|        | Schimmelpenning-Feuerstein-Mims syndrome, somatic mosaic                                                      | 163200 |
|        | Spitz nevus or nevus spilus, somatic                                                                          | 137550 |
|        | Thyroid carcinoma, follicular, somatic                                                                        | 188470 |
| IKZF1  | Immunodeficiency, common variable, 13                                                                         | 616873 |
|        | Erythrocytosis, somatic                                                                                       | 133100 |
|        | Leukemia, acute myeloid, somatic                                                                              | 601626 |
|        | Myelofibrosis, somatic                                                                                        | 254450 |
|        | Polycythemia vera, somatic                                                                                    | 263300 |
|        | Thrombocytopenia 3                                                                                            | 614521 |
|        | {Budd-Chiari syndrome, somatic}                                                                               | 600880 |
| KDM1A  | Cleft palate, psychomotor retardation, and distinctive facial features                                        | 616728 |
|        | Arteriovenous malformation of the brain, somatic                                                              | 108010 |
|        | Bladder cancer, somatic                                                                                       | 109800 |
|        | Breast cancer, somatic                                                                                        | 114480 |
|        | Cardiofaciocutaneous syndrome 2                                                                               | 615278 |
|        | Gastric cancer, somatic                                                                                       | 613659 |
|        | Leukemia, acute myeloid, somatic                                                                              | 601626 |
|        | Lung cancer, somatic                                                                                          | 211980 |
|        | Noonan syndrome 3                                                                                             | 609942 |
|        | Oculoectodermal syndrome, somatic                                                                             | 600268 |
|        | Pancreatic carcinoma, somatic                                                                                 | 260350 |
|        | RAS-associated autoimmune leukoproliferative disorder                                                         | 614470 |
|        | Schimmelpenning-Feuerstein-Mims syndrome, somatic mosaic                                                      | 163200 |
|        | LIG4 syndrome                                                                                                 | 606593 |
|        | {Multiple myeloma, resistance to}                                                                             | 254500 |
|        | Cardiofaciocutaneous syndrome 3                                                                               | 615279 |
|        | Melorheostosis, isolated, somatic mosaic                                                                      | 155950 |
|        | Cardiofaciocutaneous syndrome 4                                                                               | 615280 |
|        | NA                                                                                                            | NA     |
| MECOM  | Radioulnar synostosis with amegakaryocytic thrombocytopenia 2                                                 | 616738 |
|        | Colorectal cancer, hereditary nonpolyposis, type 2                                                            | 609310 |
|        | Mismatch repair cancer syndrome 1                                                                             | 276300 |
|        | Muir-Torre syndrome                                                                                           | 158320 |
|        | Myelofibrosis with myeloid metaplasia, somatic                                                                | 254450 |
|        | Thrombocytopenia 2                                                                                            | 601977 |
|        | Thrombocytopenia, congenital amegakaryocytic                                                                  | 604498 |
|        | Colorectal cancer, hereditary nonpolyposis, type 1                                                            | 120435 |
|        | Mismatch repair cancer syndrome 2                                                                             | 619096 |
|        | Muir-Torre syndrome                                                                                           | 158320 |
|        | Colorectal cancer, hereditary nonpolyposis, type 5                                                            | 614350 |
|        | Mismatch repair cancer syndrome 3                                                                             | 619097 |
|        | {Endometrial cancer, familial}                                                                                | 608089 |
|        | NA                                                                                                            | NA     |
|        | NA                                                                                                            | NA     |
|        | Aplastic anemia                                                                                               | 609135 |
|        | Leukemia, acute lymphoblastic                                                                                 | 613065 |
|        | Nijmegen breakage syndrome                                                                                    | 251260 |
|        | Leukemia, juvenile myelomonocytic                                                                             | 607785 |
|        | Neurofibromatosis, familial spinal                                                                            | 162210 |
|        | Neurofibromatosis, type 1                                                                                     | 162200 |
|        | Neurofibromatosis-Noonan syndrome                                                                             | 601321 |
|        | Watson syndrome                                                                                               | 193520 |
|        | Meningioma, NF2-related, somatic                                                                              | 607174 |
|        | Neurofibromatosis, type 2                                                                                     | 101000 |
|        | Schwannomatosis, somatic                                                                                      | 162091 |
|        | Dyskeratosis congenita, autosomal recessive 2                                                                 | 613987 |
|        | Severe combined immunodeficiency with microcephaly, growth retardation, and sensitivity to ionizing radiation | 611291 |
|        | Dyskeratosis congenita, autosomal recessive 1                                                                 | 224230 |
|        | Leukemia, acute myeloid, somatic                                                                              | 601626 |
|        | ?RAS-associated autoimmune lymphoproliferative syndrome type IV, somatic                                      | 614470 |
|        | Colorectal cancer, somatic                                                                                    | 114500 |
|        | Epidermal nevus, somatic                                                                                      | 162900 |
|        | Melanocytic nevus syndrome, congenital, somatic                                                               | 137550 |
|        | Neurocutaneous melanosis, somatic                                                                             | 249400 |
|        | Noonan syndrome 6                                                                                             | 613224 |
|        | Schimmelpenning-Feuerstein-Mims syndrome, somatic mosaic                                                      | 163200 |
|        | Thyroid carcinoma, follicular, somatic                                                                        | 188470 |
|        | Fanconi anemia, complementation group N                                                                       | 610832 |
|        | {Breast cancer, susceptibility to}                                                                            | 114480 |
|        | {Pancreatic cancer, susceptibility to, 3}                                                                     | 613348 |
|        | Dyskeratosis congenita, autosomal recessive 6                                                                 | 616353 |
|        | Pulmonary fibrosis and/or bone marrow failure, telomere-related, 4                                            | 616371 |
|        | {Leukemia, acute lymphoblastic, susceptibility to, 3}                                                         | 615545 |
|        | Colorectal cancer, hereditary nonpolyposis, type 4                                                            | 614337 |
|        | Mismatch repair cancer syndrome 4                                                                             | 619101 |
|        | {Glioma susceptibility 9}                                                                                     | 616568 |
|        | {Melanoma, cutaneous malignant, susceptibility to, 10}                                                        | 615848 |
|        | Aplastic anemia                                                                                               | 609135 |
|        | Hemophagocytic lymphohistiocytosis, familial, 2                                                               | 603553 |
|        | Lymphoma, non-Hodgkin                                                                                         | 605027 |
|        | LEOPARD syndrome 1                                                                                            | 151100 |
|        | Leukemia, juvenile myelomonocytic, somatic                                                                    | 607785 |
|        | Metachondromatosis                                                                                            | 156250 |
|        | Noonan syndrome 1                                                                                             | 163950 |
|        | Fanconi anemia, complementation group R                                                                       | 617244 |
|        | Mirror movements 2                                                                                            | 614508 |
|        | {Breast cancer, susceptibility to}                                                                            | 114480 |
|        | Fanconi anemia, complementation group O                                                                       | 613390 |
|        | {Breast-ovarian cancer, familial, susceptibility to, 3}                                                       | 613399 |
|        | Cardiomyopathy, dilated, 1NN                                                                                  | 615916 |

|                |                                                                    |        |
|----------------|--------------------------------------------------------------------|--------|
| RAF1           | LEOPARD syndrome 2                                                 | 611554 |
|                | Noonan syndrome 5                                                  | 611553 |
| RBBP6          | NA                                                                 | NA     |
| RBM8A          | Thrombocytopenia-absent radius syndrome                            | 274000 |
| RECQL          | NA                                                                 | NA     |
| RECQL4         | Baller-Gerold syndrome                                             | 218600 |
|                | RAPADILINO syndrome                                                | 266280 |
|                | Rothmund-Thomson syndrome, type 2                                  | 268400 |
| RMRP           | Anauxetic dysplasia 1                                              | 607095 |
|                | Cartilage-hair hypoplasia                                          | 250250 |
|                | Metaphyseal dysplasia without hypotrichosis                        | 250460 |
| RPL11          | Diamond-Blackfan anemia 7                                          | 612562 |
| RPL15          | ?Diamond-Blackfan anemia 12                                        | 615550 |
| RPL18          | ?Diamond-Blackfan anemia 18                                        | 618310 |
| RPL23          | NA                                                                 | NA     |
| RPL26          | ?Diamond-Blackfan anemia 11                                        | 614900 |
| RPL27          | ?Diamond-Blackfan anemia 16                                        | 617408 |
| RPL31          | NA                                                                 | NA     |
| RPL35          | ?Diamond-Blackfan anemia 19                                        | 618312 |
| RPL35A         | Diamond-Blackfan anemia 5                                          | 612528 |
| RPL36          | NA                                                                 | NA     |
| RPL5           | Diamond-Blackfan anemia 6                                          | 612561 |
| RPS10          | Diamond-Blackfan anemia 9                                          | 613308 |
| RPS17          | Diamond-Blackfan anemia 4                                          | 612527 |
| RPS19          | Diamond-Blackfan anemia 1                                          | 105650 |
| RPS24          | Diamond-blackfan anemia 3                                          | 610629 |
| RPS26          | Diamond-Blackfan anemia 10                                         | 613309 |
| RPS27          | ?Diamond-Blackfan anemia 17                                        | 617409 |
| RPS28          | Diamond Blackfan anemia 15 with mandibulofacial dysostosis         | 606164 |
| RPS29          | Diamond-Blackfan anemia 13                                         | 615909 |
| RPS7           | Diamond-Blackfan anemia 8                                          | 612563 |
| RIT1           | Noonan syndrome 8                                                  | 615355 |
| RTEL1          | Dyskeratosis congenita, autosomal dominant 4                       | 615190 |
|                | Dyskeratosis congenita, autosomal recessive 5                      | 615190 |
|                | Pulmonary fibrosis and/or bone marrow failure, telomere-related, 3 | 616373 |
| RUNX1          | Leukemia, acute myeloid                                            | 601626 |
|                | Platelet disorder, familial, with associated myeloid malignancy    | 601399 |
| SAMD9          | MIRAGE syndrome                                                    | 617053 |
|                | Monosomy 7 myelodysplasia and leukemia syndrome 2                  | 619041 |
|                | Tumoral calcinosis, familial, normophosphatemic                    | 610455 |
| SAMD9L         | Ataxia-pancytopenia syndrome                                       | 159550 |
|                | Monosomy 7 myelodysplasia and leukemia syndrome 1                  | 252270 |
|                | Spinocerebellar ataxia 49                                          | 619806 |
| SBD5           | Shwachman-Diamond syndrome                                         | 260400 |
|                | {Aplastic anemia, susceptibility to}                               | 609135 |
| SH2B3          | Erythrocytosis, somatic                                            | 133100 |
|                | Myelofibrosis, somatic                                             | 254450 |
|                | Thrombocythemia, somatic                                           | 187950 |
| SLX4           | Fanconi anemia, complementation group P                            | 613951 |
| SOS1           | ?Fibromatosis, gingival, 1                                         | 135300 |
|                | Noonan syndrome 4                                                  | 610733 |
| SRP54          | Neutropenia, severe congenital, 8, autosomal dominant              | 618752 |
| SRP72          | Bone marrow failure syndrome 1                                     | 614675 |
|                | Dyskeratosis congenita, autosomal dominant 1                       | 127550 |
| TERC           | {Aplastic anemia}                                                  | 614743 |
|                | {Pulmonary fibrosis, idiopathic, susceptibility to}                | 614743 |
|                | Dyskeratosis congenita, autosomal dominant 2                       | 613989 |
| TERT           | Dyskeratosis congenita, autosomal recessive 4                      | 613989 |
|                | Pulmonary fibrosis and/or bone marrow failure, telomere-related, 1 | 614742 |
|                | {Leukemia, acute myeloid}                                          | 601626 |
| TET2           | {Melanoma, cutaneous malignant, 9}                                 | 615134 |
|                | Immunodeficiency 75                                                | 619126 |
|                | Myelodysplastic syndrome, somatic                                  | 614286 |
| TINF2          | Dyskeratosis congenita, autosomal dominant 3                       | 613990 |
|                | Revesz syndrome                                                    | 268130 |
| TP53           | Bone marrow failure syndrome 5                                     | 618165 |
|                | Breast cancer, somatic                                             | 114480 |
|                | Hepatocellular carcinoma, somatic                                  | 114550 |
|                | Li-Fraumeni syndrome                                               | 151623 |
|                | Nasopharyngeal carcinoma, somatic                                  | 607107 |
|                | Pancreatic cancer, somatic                                         | 260350 |
|                | {Adrenocortical carcinoma, pediatric}                              | 202300 |
|                | {Basal cell carcinoma 7}                                           | 614740 |
|                | {Choroid plexus papilloma}                                         | 260500 |
|                | {Colorectal cancer}                                                | 114500 |
|                | {Glioma susceptibility 1}                                          | 137800 |
| {Osteosarcoma} | 259500                                                             |        |
| UBE2T          | Fanconi anemia, complementation group T                            | 616435 |
| USB1           | Poikiloderma with neutropenia                                      | 604173 |
| VPS45          | Neutropenia, severe congenital, 5, autosomal recessive             | 615285 |
| WAS            | Wiskott-Aldrich syndrome                                           | 301000 |
| WIPF1          | Wiskott-Aldrich syndrome 2                                         | 614493 |
| WRAP53         | Dyskeratosis congenita, autosomal recessive 3                      | 613988 |
| XRCC2          | ?Fanconi anemia, complementation group U                           | 617247 |
|                | ?Premature ovarian failure 17                                      | 619146 |
|                | Spermatogenic failure 50                                           | 619145 |
